# Supplementary material
Source: MDPI journal article supplement (https://www.mdpi.com/2071-1050/11/10/2796)
Supplement: s1 [file s1]

## SURVEY QUESTIONNAIRE

### 1. GENERAL INFORMATION

A) Your construction activity mainly focuses on: (Please select one option)

- Buildings
- Civil engineering (roads, bridges, etc.)
- Other, please specify:

B) Your activity mainly focuses on: (Please select one option)

- New buildings
- Refurbishment or deconstruction
- Both new building and refurbishment/demolition projects
- Other, please specify:

C) Please indicate your position: (Please select one option)

- Qualified technician
- Environmental coordinators
- project managers
- Other, please specify:

D) Please indicate the number of years you have been working for the construction sector: (Please select one option)

- Less than 1 year
- 1 - 3 years
- 3 - 5 years
- Over 5 years

E) Please, rate your knowledge regarding construction waste management:

| 1- Very poor | 2-Poor | 3- Moderate | 4- Quite well | 5- Very high |
|--------------|--------|-------------|---------------|--------------|
|              |        |             |               |              |

### 2. BEST PRACTICE MEASURES

In general, a building construction has two phases: design and execution. In turn, building rehabilitation and deconstruction projects have two well differentiated activities: those related to dismantling and reform of the building (deconstruction) and those related to the execution of the new construction (construction). Therefore, the following questions are structured as follows:

Design phase:

- Activities for rehabilitation/deconstruction
- Activities for new construction

Execution phase:

- Activities for rehabilitation/deconstruction
- Activities for new construction

**B.1) Best practices in building rehabilitation projects – design phase**

A) Which of the following best practice measures do you usually implement in the design phase of the REHABILITATION/DECONSTRUCTION ACTIVITIES? (Please select all relevant options)

- Planning selective demolition techniques
- Providing a space for the collection of CDW.
- None
- Others, please specify:

B). Which of the following best practice measures do you usually implement in the design phase of the NEW CONSTRUCTION ACTIVITIES? (Please select all relevant options)

- Use materials with a high content of recycled material, natural materials and/or eco-label.
- Use construction techniques that generate less waste (prefabricated or industrialized elements).
- Design the building to facilitate the recovery of the elements at the end of their useful life.
- Providing a space for the collection of CDW.
- None
- Others, please specify:

C). Please rate the following best practice measures regarding their viability of implementation in a building rehabilitation project: (Please when answering consider viable and economic aspects)

| Best Practice measure                                                                            | Rate                 |                    |                             |                 |                |
|--------------------------------------------------------------------------------------------------|----------------------|--------------------|-----------------------------|-----------------|----------------|
|                                                                                                  | 1- not at all viable | 2- Slightly viable | 3- Somewhat/moderate viable | 4- quite viable | 5- very viable |
| Use materials with a high content of recycled material, natural materials and/or eco-label       |                      |                    |                             |                 |                |
| Design the building to facilitate the recovery of the elements at the end of their useful life.  |                      |                    |                             |                 |                |
| Use construction techniques that generate less waste (prefabricated or industrialized elements). |                      |                    |                             |                 |                |
| Planning selective demolition techniques                                                         |                      |                    |                             |                 |                |
| Provide space for the collection of CDW                                                          |                      |                    |                             |                 |                |

D). Please rate the following best practice measures regarding their effective to minimize or correctly manage CDW in a building rehabilitation project:

| Best Practice measure                                                                           | Rate                    |                       |                                |                    |                   |
|-------------------------------------------------------------------------------------------------|-------------------------|-----------------------|--------------------------------|--------------------|-------------------|
|                                                                                                 | 1- not at all effective | 2- Slightly effective | 3- Somewhat/moderate effective | 4- quite effective | 5- very effective |
| Use materials with a high content of recycled material, natural materials and/or eco-label      |                         |                       |                                |                    |                   |
| Design the building to facilitate the recovery of the elements at the end of their useful life. |                         |                       |                                |                    |                   |
| Use construction techniques that generate less waste (prefabricated or industrialized           |                         |                       |                                |                    |                   |

| Best Practice measure                    | Rate                    |                       |                                |                    |                   |
|------------------------------------------|-------------------------|-----------------------|--------------------------------|--------------------|-------------------|
|                                          | 1- not at all effective | 2- Slightly effective | 3- Somewhat/moderate effective | 4- quite effective | 5- very effective |
| elements).                               |                         |                       |                                |                    |                   |
| Planning selective demolition techniques |                         |                       |                                |                    |                   |
| Provide space for the collection of CDW  |                         |                       |                                |                    |                   |

## B.2) Best practices in building rehabilitation projects – execution phase

A). Which of the following best practice measures do you usually implement in the execution phase of the REHABILITATION/ DECONSTRUCTION ACTIVITIES? (Please select all relevant options)

- Removing decorative elements.
- Dismantling neatly carpentry, sanitary equipment
- Uninstalling heating networks, plumbing, electricity, etc.
- Dismantling exterior elements, false ceilings and recoverable coatings.
- Dismantling roofs, covers and interior divisions.
- Demolishing the structure in a controlled manner.
- Estimating the mass and volume of waste to be generated, as well as the type and quantity of containers required.
- Hiring authorized companies for the management of waste.
- Establishing a container for each type of CDW and respect its use.
- Using small containers in work areas.
- Training and informing all personnel of the correct labeling of containers and their responsibilities in the field of waste.
- Use of machinery for the management of CDW (crushers and compactors).
- Recording the date of withdrawal, quantities and characteristics of the waste.
- Creating documents that collect instructions regarding the different processes that generate waste to ensure that each task is well defined.
- Control and follow up.
- Commitment to apply Best Practices as a complementary criterion for the award of the work
- None
- Others, please specify:

B). Which of the following best practice measures do you usually implement in the execution phase of the NEW CONSTRUCTION ACTIVITIES? (Please select all relevant options)

- Estimating the mass and volume of waste to be generated, as well as the type and quantity of containers required.
- Hiring authorized companies for the management of waste.
- Purchase of bulk materials to reduce packaging and generate less waste.
- Hiring suppliers who manage the waste of their products and/or having some type of environmental certificate.
- Maximum use of materials and products, using mixing systems with mechanical dosing.
- Managing the reception and collection on the work of the products according to the needs of use in each moment to avoid the generation of waste of damaged/expired material.
- Observing the manufacturer's instructions regarding the transportation, collection and commissioning of materials to avoid breakage.

- Establishing a container for each type of CDW and respect its use.
- Using small containers in work areas.
- Reusing materials within the work. Detecting those items that can support reusable materials from the work itself.
- Training and informing all personnel of the correct labeling of containers and their responsibilities in the field of waste.
- Use of machinery for the management of CDW (crushers and compactors).
- Recording the date of withdrawal, quantities and characteristics of the waste.
- Creating documents that collect instructions regarding the different processes that generate waste to ensure that each task is well defined.
- Control and follow up.
- Commitment to apply Best Practices as a complementary criterion for the award of the work
- None
- Others, please specify:

C). Please rate the following best practice measures regarding their viability of implementation in a building rehabilitation project: (Please when answering consider viable and economic aspects)

| Best Practice measure                                                                                                                                                        | Rate                 |                    |                             |                 |                |
|------------------------------------------------------------------------------------------------------------------------------------------------------------------------------|----------------------|--------------------|-----------------------------|-----------------|----------------|
|                                                                                                                                                                              | 1- not at all viable | 2- Slightly viable | 3- Somewhat/moderate viable | 4- quite viable | 5- very viable |
| Remove decorative elements.                                                                                                                                                  |                      |                    |                             |                 |                |
| Dismantling neatly carpentry, sanitary equipment                                                                                                                             |                      |                    |                             |                 |                |
| Uninstall heating networks, plumbing, electricity, etc.                                                                                                                      |                      |                    |                             |                 |                |
| Dismantling exterior elements, false ceilings and recoverable coatings.                                                                                                      |                      |                    |                             |                 |                |
| Dismantling roofs, covers and interior divisions.                                                                                                                            |                      |                    |                             |                 |                |
| Demolishing the structure in a controlled manner.                                                                                                                            |                      |                    |                             |                 |                |
| Estimating the mass and volume of waste to be generated, as well as the type and quantity of containers required.                                                            |                      |                    |                             |                 |                |
| Hiring authorized companies for the management of waste.                                                                                                                     |                      |                    |                             |                 |                |
| Purchase of bulk materials to reduce packaging and generate less waste.                                                                                                      |                      |                    |                             |                 |                |
| Hiring suppliers who manage the waste of their products and/or having some type of environmental certificate.                                                                |                      |                    |                             |                 |                |
| Maximum use of materials and products, using mixing systems with mechanical dosing.                                                                                          |                      |                    |                             |                 |                |
| Managing the reception and collection on the work of the products according to the needs of use in each moment to avoid the generation of waste of damaged/expired material. |                      |                    |                             |                 |                |
| Observing the manufacturer's instructions regarding the transportation, collection and commissioning of materials to avoid breakage.                                         |                      |                    |                             |                 |                |
| Establishing a container for each type of CDW and respect its use.                                                                                                           |                      |                    |                             |                 |                |
| Using small containers in work areas.                                                                                                                                        |                      |                    |                             |                 |                |
| Reusing materials within the work. Detecting those items that can support reusable materials from the work itself.                                                           |                      |                    |                             |                 |                |
| Training and informing all personnel of the correct labeling of containers and their responsibilities in the field of waste.                                                 |                      |                    |                             |                 |                |
| Use of machinery for the management of CDW (crushers and compactors).                                                                                                        |                      |                    |                             |                 |                |
| Recording the date of withdrawal, quantities and characteristics of the waste.                                                                                               |                      |                    |                             |                 |                |
| Creating documents that collect instructions regarding the different processes that generate waste to ensure that each                                                       |                      |                    |                             |                 |                |

| Best Practice measure                                                                     | Rate                 |                    |                             |                 |                |
|-------------------------------------------------------------------------------------------|----------------------|--------------------|-----------------------------|-----------------|----------------|
|                                                                                           | 1- not at all viable | 2- Slightly viable | 3- Somewhat/moderate viable | 4- quite viable | 5- very viable |
| task is well defined.                                                                     |                      |                    |                             |                 |                |
| Control and follow up.                                                                    |                      |                    |                             |                 |                |
| Commitment to apply Best Practices as a complementary criterion for the award of the work |                      |                    |                             |                 |                |

D). Please rate the following best practice measures regarding their effectiveness to minimize or correctly manage CDW in a building rehabilitation project:

| Best Practice measure                                                                                                                                                        | Rate                    |                       |                                |                    |                   |
|------------------------------------------------------------------------------------------------------------------------------------------------------------------------------|-------------------------|-----------------------|--------------------------------|--------------------|-------------------|
|                                                                                                                                                                              | 1- not at all effective | 2- Slightly effective | 3- Somewhat/moderate effective | 4- quite effective | 5- very effective |
| Remove decorative elements.                                                                                                                                                  |                         |                       |                                |                    |                   |
| Dismantling neatly carpentry, sanitary equipment                                                                                                                             |                         |                       |                                |                    |                   |
| Uninstall heating networks, plumbing, electricity, etc.                                                                                                                      |                         |                       |                                |                    |                   |
| Dismantling exterior elements, false ceilings and recoverable coatings.                                                                                                      |                         |                       |                                |                    |                   |
| Dismantling roofs, covers and interior divisions.                                                                                                                            |                         |                       |                                |                    |                   |
| Demolishing the structure in a controlled manner.                                                                                                                            |                         |                       |                                |                    |                   |
| Estimating the mass and volume of waste to be generated, as well as the type and quantity of containers required.                                                            |                         |                       |                                |                    |                   |
| Hiring authorized companies for the management of waste.                                                                                                                     |                         |                       |                                |                    |                   |
| Purchase of bulk materials to reduce packaging and generate less waste.                                                                                                      |                         |                       |                                |                    |                   |
| Hiring suppliers who manage the waste of their products and/or having some type of environmental certificate.                                                                |                         |                       |                                |                    |                   |
| Maximum use of materials and products, using mixing systems with mechanical dosing.                                                                                          |                         |                       |                                |                    |                   |
| Managing the reception and collection on the work of the products according to the needs of use in each moment to avoid the generation of waste of damaged/expired material. |                         |                       |                                |                    |                   |
| Observing the manufacturer's instructions regarding the transportation, collection and commissioning of materials to avoid breakage.                                         |                         |                       |                                |                    |                   |
| Establishing a container for each type of CDW and respect its use.                                                                                                           |                         |                       |                                |                    |                   |
| Using small containers in work areas.                                                                                                                                        |                         |                       |                                |                    |                   |
| Reusing materials within the work. Detecting those items that can support reusable materials from the work itself.                                                           |                         |                       |                                |                    |                   |
| Training and informing all personnel of the correct labeling of containers and their responsibilities in the field of waste.                                                 |                         |                       |                                |                    |                   |
| Use of machinery for the management of CDW (crushers and compactors).                                                                                                        |                         |                       |                                |                    |                   |
| Recording the date of withdrawal, quantities and characteristics of the waste.                                                                                               |                         |                       |                                |                    |                   |
| Creating documents that collect instructions regarding the different processes that generate waste to ensure that each task is well defined.                                 |                         |                       |                                |                    |                   |
| Control and follow up.                                                                                                                                                       |                         |                       |                                |                    |                   |
| Commitment to apply Best Practices as a complementary criterion for the award of the work                                                                                    |                         |                       |                                |                    |                   |

### **3. FINAL COMMENTS**

A). If you consider any other best practice not described above, please indicate it below and rate it according to its viability and effectiveness in a scale between 1 to 5, where 5 denotes a very effective or viable measure and 1 means insignificant or not viable (Please explain briefly)

B). Please indicate below any other comment or suggestion:

**THANK YOU!**
